# Supplementary material
Source: Research Square preprint supplement (doi:10.21203/rs.3.rs-10246589/v1)
Supplement: Supplementary file 1 [file 2269f41f490dbb08a168ef01.docx]

**Supplementary Information for:**
*Do-Calculus Interventions in Predictive Coding Networks: Formal Correspondence, Empirical Validation, and Architectural Prescriptions for Clinical Causal AI*

Hassan Farooq¹, ¹Sargodha Medical College

**S1. Extended Derivation of Proposition 1**

Let 𝒢 be a DAG over variables {X₁,…,Xₙ} with linear-Gaussian structural equations Xᵢ = Σⱼ∈pa(i) wᵢⱼXⱼ + εᵢ, εᵢ ~ N(0,σᵢ²). Let the PC network have one state layer per node, with generative weights initialized to (or trained to recover) {wᵢⱼ}.

*Step 1 — Observational inference.* With no clamping, free-energy minimization drives each state xᵢ toward E[Xᵢ | observations], since the fixed point of gradient descent on ℱ under Gaussian assumptions coincides with the posterior mean of the corresponding linear-Gaussian graphical model.

*Step 2 — Graph surgery vs. error suppression.* do(Xⱼ = x) deletes all edges into Xⱼ. Hard-clamping xⱼ = x alone still lets the bottom-up error δⱼ propagate to parent layers, which implements conditioning, not surgery.

*Step 3 — Why suppression restores surgery.* Zeroing the bottom-up term at the clamped node removes exactly the pathway that would otherwise let evidence flow from child to parent — the computational analogue of edge deletion.

*Step 4 — Equivalence.* Both the SCM-under-do and PC-under-clamp-with-suppression yield the same factorized fixed-point distribution over non-descendants and descendants of Xⱼ: P(𝒢_{X̄ⱼ})(x₋ⱼ | do(Xⱼ=x)) = PC(x₋ⱼ | clamp(Xⱼ=x), suppress).

*Numerical confirmation (§3.1):* E[D|do(S=1)] = 0.000 vs. E[D|S=1] (no suppression) = 0.640.

**S2. Hyperparameters and Training Configuration (Table S1)**

| **Parameter** | **Value** | **Unit** | **Source / Justification** |
| --- | --- | --- | --- |
| PC inference learning rate | 0.05 | — | Grid search; ablation confirmed |
| PC weight learning rate | 0.001 | — | Grid search |
| PC weight decay | *not reported* | — | Adam default |
| PC latent dimension (primary) | 4 | units | Ablation 3: lowest gap |
| PC inference steps | 100 | steps | Convergence check |
| PC training epochs (IHDP) | 200 | epochs | Learning curve analysis |
| PC training epochs (MIMIC-IV) | 200 | epochs | Learning curve analysis |
| PC batch size (IHDP) | 32 | samples | Standard |
| PC batch size (MIMIC-IV) | 16 | samples | Adjusted for small n |
| PC precision scalar Π | 1.0 | — | Identity |
| MLP hidden dimensions | [16, 8] | units | Capacity matching |
| MLP learning rate | 0.001 | — | Adam default |
| MLP training epochs (IHDP) | 300 | epochs | Convergence check |
| MLP batch size (IHDP) | 64 | samples | Standard |
| Bootstrap resamples | 1,000 | resamples | Standard practice |
| Permutation iterations | 10,000 | iterations | Standard practice |
| Random seeds (IHDP, MLP) | 20 | seeds | Pre-specified |
| Random seeds (IHDP, PC) | 10+3 | seeds | 10 primary + 3 stability |
| Random seeds (MIMIC-IV) | 5 | seeds | Computational budget |
| IHDP sample size | 747 | patients | Hill (2011) |
| IHDP train/test split | 80/20 | % | Pre-specified |
| IHDP noise SD | 0.1 | outcome units | Hill (2011) DGP |
| IHDP true ATE | 4.0 | outcome units | Hill (2011) DGP |
| IHDP coefficient vector β | [0.1, 0.2, 0.0, 0.1, 0.0, 0.3, 0.0, 0.2, 0.1, 0.0] | — | Hill (2011) reconstruction |
| MIMIC-IV sample size | 140 | ICU stays | MIMIC-IV Demo v2.2 |
| MIMIC-IV noise SD | 0.3 | log-LOS units | Constructed DGP |
| MIMIC-IV true ATE | 1.0 | log-LOS units | Constructed DGP |
| MIMIC-IV coefficient vector β | [0.3, −0.1, 0.2, 0.4, −0.1, 0.1, 0.1, −0.05, 0.2, 0.3, 0.5] | — | Constructed DGP |
| SCM confounding strength γ | {0.1, 0.5, 1.0, 2.0} | — | Ablation 1 design |
| SCM base treatment effect | 2.0 | outcome units | Ablation design |
| SCM noise SD | 0.3 | outcome units | Ablation design |
| Toy SCM weight (D→S) | 0.8 | — | Structural equation |
| Toy SCM weight (S→T) | 0.6 | — | Structural equation |

**S3. Full Results Tables**

**Table S2 — Parameter-Matching Check (Toy SCM)**

| **Model** | **MAE** | **MSE** | **Trainable Parameters** |
| --- | --- | --- | --- |
| MLP Baseline | 0.3580 | 0.2019 | 7 |
| PC (Ground Truth Weights) | 0.3581 | 0.2019 | 2 weights + inference states |
| Gap | 0.0001 | 0.0000 | — |

**Table S3 — Proposition 1 Validation**

| **Condition** | **Inferred D** | **Expected** |
| --- | --- | --- |
| + suppression (do(S=1)) | 0.000 | 0.000 (matches SCM prior) |
| − suppression (conditioning) | 0.640 | — |
| Monte Carlo distribution (N=1,000) | KS = 0.017, p = 0.920 vs. N(0,1) | — |

**Table S4 — MLP vs. PCNetworkV2 on IHDP**

| **Model** | **Seeds** | **Obs MAE (mean±SD)** | **Int MAE (mean±SD)** | **Gap** | **95% CI** | **p** |
| --- | --- | --- | --- | --- | --- | --- |
| MLP Baseline | 20 | 0.1056 ± 0.0085 | 3.3210 ± 0.0064 | 3.2154 | [3.211, 3.220] | <0.0001 |
| PC Network (V2) | 10 | 0.4613 ± 0.1197 | 3.4400 ± 0.0996 | 2.9787 | [2.899, 3.048] | <0.0001 |
| Difference (PC − MLP) | — | — | — | −0.237 | — | <0.0001 |

**Table S5 — Ablation 1: Confounding Strength (γ)**

| **γ** | **True ATE** | **MLP Gap** | **PC Gap** | **PC − MLP** |
| --- | --- | --- | --- | --- |
| 0.1 | 2.000 | 0.795 | 0.464 | −0.331 |
| 0.5 | 2.000 | 0.825 | 0.459 | −0.366 |
| 1.0 | 2.000 | 0.840 | 0.504 | −0.336 |
| 2.0 | 2.000 | 0.827 | 0.609 | −0.218 |

**Table S6 — Ablation 2: Interventional Training Fraction**

| **Fraction** | **PC Obs MAE** | **PC Int MAE** | **PC Gap** |
| --- | --- | --- | --- |
| 0.00 | 0.757 | 1.216 | 0.459 |
| 0.05 | 0.787 | 1.147 | 0.360 |
| 0.10 | 0.761 | 1.017 | 0.256 |
| 0.25 | 0.893 | 1.456 | 0.563 |
| 0.50 | 0.976 | 0.664 | −0.312 |

**Table S7 — Ablation 3: Latent Dimension (dz)**

| **dz** | **Obs MAE** | **Int MAE** | **Gap** |
| --- | --- | --- | --- |
| 4 | 0.757 | 1.216 | 0.459 |
| 8 | 0.999 | 2.016 | 1.018 |
| 16 | 1.126 | 2.343 | 1.217 |
| 32 | 1.850 | 3.885 | 2.036 |

**Table S8 — Topology Robustness**

| **Topology** | **True ATE** | **MLP Gap** | **PC Gap** | **PC − MLP** |
| --- | --- | --- | --- | --- |
| Chain | 2.005 | 0.522 | 0.415 | −0.108 |
| Mediator | 2.005 | 0.648 | 0.132 | −0.516 |
| Collider | 2.000 | 0.876 | −0.268 | −1.144 |
| Fork | 0.000 | −0.206 | −0.212 | −0.005 |

**Table S9 — MIMIC-IV: PCNetworkV3 vs. MLP**

| **Model** | **Obs MAE (mean±SD)** | **Int MAE (mean±SD)** | **Gap** | **ATE Est.** | **ATE Error** |
| --- | --- | --- | --- | --- | --- |
| MLP Baseline | 0.3299 ± 0.0250 | 0.2797 ± 0.0231 | −0.050 | 1.015 | 0.015 |
| PC V3 | 0.4549 ± 0.0378 | 0.3345 ± 0.0417 | −0.120 | 0.917 | 0.083 |

**S4. Reproducibility Details**

- Code, seeds, configs: https://github.com/hadbierox196/Do-calculus-interventions (archived: https://doi.org/10.5281/zenodo.21186553)
- Environment: Google Colab, Python 3.12, PyTorch 2.3.1, NumPy, Pandas, Matplotlib
- MIMIC-IV Clinical Database Demo v2.2 via PhysioNet (data use agreement)
- IHDP counterfactuals reconstructed from Hill (2011) NPCI Simulation 1 DGP equations (Limitation L2)
- Statistical tests: permutation tests (10,000 permutations, two-sided, α=0.05); bootstrap CIs (percentile method, 1,000 resamples); no multiple-comparison correction (all conditions pre-specified)
